# Supplementary material for: Putative Multifunctional Signature of Lung Metastases in Dedifferentiated Chondrosarcoma
Source: Hindawi journal article supplement (doi:10.1155/2012/820254), 2012-01-01
Supplement: f1 [file 820254.f1.xls]

## Sheet: Table 1
															Gene	Forward Primer (5’-3’)	Reverse Primer (5’-3’)	Amplicon
Cav.2	Ratio														SERPINE2	AACCAAAGCTTCAGCAGCAAC	GCCCCATGAATAACACAGCAC	127bp
UIFU0	0.73														uPA	TTCTTACCCTGGATCCGCAGT	AATGACAACCAGCAAGAAAGC	105bp
UIGE0	0.85														tPA	GAAACCCAGATCGAGACTCAAA	CAGTCACTGTTTCCCTCAGAGC	106bp
UIFK0	3.55														IL-8	TTGTTCCACTGTGCCTTGGTT	AAGTGCTTCCACATGTCCTCAC	101bp
UIGP0	3.23														CAV.2	ACTACGCACTCCTTTGAC	AAGGCAGAACCATTAGGC	242bp
UIGD0	3.17														CCL2	GTCTCTGCCGCCCTTCTG	ACTTGCTGCTGATTCTTC	169bp
UIEK0	3.59
UIGX0	3.03
IL8	Ratio
UIFU0	0.64
UIGE0	0.73
UIFK0	8.68
UIGP0	33.62
UIGD0	44.1
UIEK0	82.63
UIGX0	18.96
CCL2	Ratio
UIFU0	0.62
UIGE0	0.91
UIFK0	2.59
UIGP0	1.91
UIGD0	4.75
UIEK0	2.25
UIGX0	2.05
SERPINE2	Ratio
UIFU0	0.81
UIGE0	0.88
UIFK0	0.13
UIGP0	0.07
UIGD0	0.07
UIEK0	0.44
UIGX0	0.1
uPA	Ratio
UIFU0	0.7
UIGE0	0.8
UIFK0	39.52
UIGP0	37.94
UIGD0	7.84
UIEK0	39.48
UIGX0	24.94
tPA	Ratio
UIFU0	0.89
UIGE0	0.98
UIFK0	15.21
UIGP0	20.93
UIGD0	7.95
UIEK0	8.05
UIGX0	17.94

## Sheet: Table 2
	Up-regulated in all Met.- cell lines		Down-regulated in all Met.- cell lines			Multi-functional genes “commonly” expressed in the metastases			Multi-functional genes expressed in the virtual non-metastatic tumor			Metastasis associated literature (GeneGo)			“Multi-functional” grid(GeneGo)
Gene simbol	Gene name	Gene simbol	Gene name		Gene simbol			Gene simbol			Gene simbol			Gene ID
ACTB	Actin, beta	SERPINE2	Serpin peptidase inhibitor, clade E (nexin, plasminogen activator inhibitor type 1), member 2		ACTB	Actin, beta		ACTB	Actin, beta		ABI3			Hs.5062
CAV1	Caveolin 1, caveolae protein, 22kDa	TGFBI	Transforming growth factor, beta-induced, 68kDa		CAV1	Caveolin 1, caveolae protein, 22kDa		CAV1	Caveolin 1, caveolae protein, 22kDa		ACP5			Hs.270364
CAV2	Caveolin 2	BGN	Biglycan		CAV2	Caveolin 2		CCL2	Chemokine (C-C motif) ligand 2		ADAMTS13			Hs.2257
CCL2	Chemokine (C-C motif) ligand 2	BTF3	Basic transcription factor 3		CCL2	Chemokine (C-C motif) ligand 2		ITGB1	Integrin, beta 1 (fibronectin receptor, beta polypeptide, antigen CD29 includes MDF2, MSK12)		ADM			Hs.73793
DBN1	Drebrin 1	C1R	Complement component 1, r subcomponent		DBN1	Drebrin 1		VCL	Vinculin		AFP			Hs.1103
IL8	Interleukin 8	COL1A1	Collagen, type I, alpha 1		ITGB1	Integrin, beta 1 (fibronectin receptor, beta polypeptide, antigen CD29 includes MDF2, MSK12)		ACTG1	Actin, gamma 1		AGER			Hs.489646
ITGB1	Integrin, beta 1 (fibronectin receptor, beta polypeptide, antigen CD29 includes MDF2, MSK12)	COL1A2	Collagen, type I, alpha 2		IL8	Interleukin 8		BCAR1	Breast cancer anti-estrogen resistance 1		AGR2			Hs.99855
MSN	Moesin	COL3A1	Collagen, type III, alpha 1 (Ehlers-Danlos syndrome type IV, autosomal dominant)		MSN	Moesin		CD44	CD44 antigen (homing function and Indian blood group system)		AKT2			Hs.517293
PLAT	Plasminogen activator, tissue	COL6A2	Collagen, type VI, alpha 2		PLAT	Plasminogen activator, tissue		CD9	CD9 antigen (p24)		ALCAM			Hs.212332
PLAU	Plasminogen activator, urokinase	COPZ2	Coatomer protein complex, subunit zeta 2		PLAU	Plasminogen activator, urokinase		CTGF	Connective tissue growth factor		AMBP			Hs.514913
TFPI2	Tissue factor pathway inhibitor 2	DGKI	Diacylglycerol kinase, iota		TNC	Tenascin C (hexabrachion)		CTNNB1	Catenin (cadherin-associated protein), beta 1, 88kDa		ANGPTL4			Hs.284244
TNC	Tenascin C (hexabrachion)	DIA1	Cytochrome b5 reductase 3		TFPI2	Tissue factor pathway inhibitor 2		CXCL1	Chemokine (C-X-C motif) ligand 1 (melanoma growth stimulating activity, alpha)		ANK1			Hs.409034
VCL	Vinculin	EDF1	Endothelial differentiation-related factor 1		VCL	Vinculin		CYR61	Cysteine-rich, angiogenic inducer, 61		ANXA1			Hs.497039
ACO1	Aconitase 1, soluble	EEF1A1	Eukaryotic translation elongation factor 1 alpha 1		NRP1	Neuropilin 1		F11R	F11 receptor		APAF1			Hs.351593
ADAM9	ADAM metallopeptidase domain 9 (meltrin gamma)	EEF1G	Eukaryotic translation elongation factor 1 gamma		ACTG1	Actin, gamma 1		F2R	Coagulation factor II (thrombin) receptor		ARG1			Hs.374230
ADAMTS16	ADAM metallopeptidase with thrombospondin type 1 motif, 16	EIF4A1	Eukaryotic translation initiation factor 4A, isoform 1		BCAR1	Breast cancer anti-estrogen resistance 1		FN1	Fibronectin 1		ATBF1			Hs.409662
ANTXR1	Anthrax toxin receptor 1	FLJ22662	Hypothetical protein FLJ22662		CTNNB1	Catenin (cadherin-associated protein), beta 1, 88kDa		HRAS	V-Ha-ras Harvey rat sarcoma viral oncogene homolog		BAG1			Hs.13640
APLP2	Amyloid beta (A4) precursor-like protein 2	GABARAP	GABA(A) receptor-associated protein		CD44	CD44 antigen (homing function and Indian blood group system)		ILK	Integrin-linked kinase-2		BAI1			Hs.87752
ARMCX2	Armadillo repeat containing, X-linked 2	GNB2L1	Guanine nucleotide binding protein (G protein), beta polypeptide 2-like 1		CD9	CD9 antigen (p24)		LRP1	Low density lipoprotein-related protein 1 (alpha-2-macroglobulin receptor)		BCAR1			Hs.336994
ARPC5	Actin related protein 2/3 complex, subunit 5, 16kDa	GPX4	Glutathione peroxidase 4 (phospholipid hydroperoxidase)		CXCL1	Chemokine (C-X-C motif) ligand 1 (melanoma growth stimulating activity, alpha)		MAP2K1	Mitogen-activated protein kinase kinase 1		BCAS3			Hs.479754
ARS2	Arsenate resistance protein ARS2	GRCC10	Likely ortholog of mouse gene rich cluster, C10 gene		F2R	Coagulation factor II (thrombin) receptor		MMP1	Matrix metallopeptidase 1 (interstitial collagenase)		BCL2			Hs.120949
ASPH	Aspartate beta-hydroxylase	HMOX1	Heme oxygenase (decycling) 1		CTGF	Connective tissue growth factor		MMP2	Matrix metallopeptidase 2 (gelatinase A, 72kDa gelatinase, 72kDa type IV collagenase)		BCL2L1			Hs.845
ATP1B3	ATPase, Na+/K+ transporting, beta 3 polypeptide	IFITM2	Interferon induced transmembrane protein 2 (1-8D)		CYR61	Cysteine-rich, angiogenic inducer, 61		SERPINE1	Serpin peptidase inhibitor, clade E (nexin, plasminogen activator inhibitor type 1), member 1		BCMP11			Hs.567231
ATP6AP1	ATPase, H+ transporting, lysosomal accessory protein 1	IFITM3	Interferon induced transmembrane protein 3 (1-8U)		F11R	F11 receptor		TM4SF8	Tetraspanin 3		BIRC5			Hs.445733
C9orf123	Chromosome 9 open reading frame 123	IGFBP6	Insulin-like growth factor binding protein 6		FN1	Fibronectin 1		THBS1	Thrombospondin 1		BMP2			Hs.203717
CaMKIINalpha	Calcium/calmodulin-dependent protein kinase II inhibitor 1	IMPDH2	IMP (inosine monophosphate) dehydrogenase 2		ILK	Integrin-linked kinase-2		TPBG	Trophoblast glycoprotein		BMP4			Hs.252418
CCNG1	Cyclin G1	JTB	Jumping translocation breakpoint		LRP1	Low density lipoprotein-related protein 1 (alpha-2-macroglobulin receptor)		TXN	Thioredoxin		BMP5			Hs.252820
CD47	CD47 antigen (Rh-related antigen, integrin-associated signal transducer)	KIAA1068	NudC domain containing 3		MMP1	Matrix metallopeptidase 1 (interstitial collagenase)		BMP4	Bone morphogenetic protein 4		BMP6			Hs.113222
CFL1	Cofilin 1 (non-muscle)	KRTCAP2	Keratinocyte associated protein 2		MMP2	Matrix metallopeptidase 2 (gelatinase A, 72kDa gelatinase, 72kDa type IV collagenase)		CCL11	Chemokine (C-C motif) ligand 11		BMP7			Hs.218040
CRIM1	Cysteine rich transmembrane BMP regulator 1 (chordin-like)	LAMB2	Laminin, beta 2 (laminin S)		MAP2K1	Mitogen-activated protein kinase kinase 1		COL14A1	Collagen, type XIV, alpha 1 (undulin)		BRAF			Hs.56729
CRR9	Cisplatin resistance related protein CRR9p	MGC4172	Short-chain dehydrogenase/reductase		SERPINE1	Serpin peptidase inhibitor, clade E (nexin, plasminogen activator inhibitor type 1), member 1		COL15A1	Collagen, type XV, alpha 1		BRMS1			Hs.482562
DCBLD2	Discoidin, CUB and LCCL domain containing 2	MXRA8	Matrix-remodelling associated 8		TM4SF8	Tetraspanin 3		ECGF1	Similar to MGC52679 protein		BRMS1L			Hs.469244
DKFZP564B167	Brain protein 44	NNMT	Nicotinamide N-methyltransferase		TXN	Thioredoxin		ENG	Endoglin (Osler-Rendu-Weber syndrome 1)		BSG			Hs.512079
DKFZP564K0822	EGFR-coamplified and overexpressed protein	PLSCR3	Phospholipid scramblase 3		THBS1	Thrombospondin 1		FGG	Fibrinogen gamma chain		C9orf127			Hs.546255
DKFZP586H2123	Regeneration associated muscle protease	PPAP2B	Phosphatidic acid phosphatase type 2B		TPBG	Trophoblast glycoprotein		GSK3B	Glycogen synthase kinase 3 beta		CALR			Hs.2159
DKK3	Dickkopf homolog 3 (Xenopus laevis)	PSPH	Phosphoserine phosphatase		HRAS	V-Ha-ras Harvey rat sarcoma viral oncogene homolog		MAPK14	Mitogen-activated protein kinase 14		CAMK2G			Hs.567242
DLC1	Deleted in liver cancer 1	PTTG1IP	Pituitary tumor-transforming 1 interacting protein		SERPINE2	Serpin peptidase inhibitor, clade E (nexin, plasminogen activator inhibitor type 1), member 2		SPHK2	Sphingosine kinase 2		CASP10			Hs.164226
DUSP1	Dual specificity phosphatase 1	PTX3	Pentraxin-related gene, rapidly induced by IL-1 beta		TGFBI	Transforming growth factor, beta-induced, 68kDa		TGFB1	Transforming growth factor, beta 1 (Camurati-Engelmann disease)		CASP8			Hs.496096
ELL2	Elongation factor, RNA polymerase II, 2	RCN3	Reticulocalbin 3, EF-hand calcium binding domain					TNFRSF12A	Tumor necrosis factor receptor superfamily, member 12A		CAV1			Hs.459142
FAT	FAT tumor suppressor homolog 1 (Drosophila)	RPL10A	Ribosomal protein L10a					VEGF	Vascular endothelial growth factor		CBR3			Hs.502328
G0S2	G0/G1switch 2	RPL13	Ribosomal protein L13					VEGFC	Vascular endothelial growth factor C		CCL7			Hs.13305
GDI1	GDP dissociation inhibitor 1	RPL13A	Ribosomal protein L13a					AGC1	Aggrecan 1		CCNB1			Hs.73917
GFPT1	Glutamine-fructose-6-phosphate transaminase 1	RPL18A	Ribosomal protein L18a					ELN	Elastin (supravalvular aortic stenosis, Williams-Beuren syndrome)		CCNG1			Hs.485233
GNG11	Guanine nucleotide binding protein (G protein), gamma 11	RPL23	Ribosomal protein L23					SERPINE2	Serpin peptidase inhibitor, clade E (nexin, plasminogen activator inhibitor type 1), member 2		CCR7			Hs.332012
GPX3	Glutathione peroxidase 3 (plasma)	RPL26	Similar to 60S ribosomal protein L26					SFRP4	Secreted frizzled-related protein 4		CD151			Hs.54460
GREM1	Gremlin 1, cysteine knot superfamily, homolog (Xenopus laevis)	RPL27	Ribosomal protein L27					TGFBI	Transforming growth factor, beta-induced, 68kDa		CD44			Hs.789
GRINA	Glutamate receptor, ionotropic, N-methyl D-asparate-associated protein 1 (glutamate binding)	RPL27A	Ribosomal protein L27a								CD82			Hs.846
HLA-A	Major histocompatibility complex, class I, A	RPL31	Ribosomal protein L31								CD9			Hs.531668
HLA-C	Major histocompatibility complex, class I, C	RPL36	Ribosomal protein L36								CDC2			Hs.125221
HLA-E	Major histocompatibility complex, class I, E	RPL37A	Ribosomal protein L37a								CDH1			Hs.356624
HMGA1	High mobility group AT-hook 1	RPL38	Ribosomal protein L38								CDH17			Hs.310458
HNRPM	Heterogeneous nuclear ribonucleoprotein M	RPL39	Ribosomal protein L39								CDH19			Hs.82128
HSPCA	Heat shock 90kDa protein 1, alpha	RPL6	Ribosomal protein L6								CDH20			Hs.511748
HSPH1	Heat shock 105kDa/110kDa protein 1	RPL8	Ribosomal protein L8								CDH6			Hs.131704
IGFBP5	Insulin-like growth factor binding protein 5	RPLP0	Ribosomal protein, large, P0								CDKN1B			Hs.567340
ILF2	Interleukin enhancer binding factor 2, 45kDa	RPS12	Ribosomal protein S12								CDKN2A			Hs.145586
LENG4	Leukocyte receptor cluster (LRC) member 4	RPS18	Ribosomal protein S18								CEACAM1			Hs.170009
MCFD2	Multiple coagulation factor deficiency 2	RPS19	Ribosomal protein S19								CEACAM5			Hs.429052
MGC5395	AHNAK nucleoprotein (desmoyokin)	RPS2	Ribosomal protein S2								CLDN1			Hs.145442
MGLL	Monoglyceride lipase	RPS20	Ribosomal protein S20								CR1			Hs.89679
MT1J	Metallothionein 1J	RPS24	Ribosomal protein S24								CRK			Hs.497636
MTPN	Myotrophin	RPS27	Tetraspanin 9								CRMP1			Hs.528006
NDUFAB1	NADH dehydrogenase (ubiquinone) 1, alpha/beta subcomplex, 1, 8kDa	RPS28	Ribosomal protein S28								CRSP3			Hs.446336
NDUFB5	NADH dehydrogenase (ubiquinone) 1 beta subcomplex, 5, 16kDa	RPS3	Ribosomal protein S3								CRYAB			Hs.77274
NOMO2	NODAL modulator 2	RPS5	Ribosomal protein S5								CST3			Hs.268107
PAPPA	Pregnancy-associated plasma protein A, pappalysin 1	RRN3	RRN3 RNA polymerase I transcription factor homolog (yeast)								CST7			Hs.8867
PERP	PERP, TP53 apoptosis effector	TMSB4X	Thymosin, beta 4, X-linked								CTAG1B			Hs.15159
PRDX3	Peroxiredoxin 3	TPM4	Tropomyosin 4								CTGF			Hs.1695
QSCN6	Quiescin Q6	TPT1	Tumor protein, translationally-controlled 1								CTNNB1			Hs.73734
RFC2	Replication factor C (activator 1) 2, 40kDa	WARS	Tryptophanyl-tRNA synthetase								CTNND1			Hs.198252
RPL10	Ribosomal protein L10										CTSB			Hs.624
RTN4	Reticulon 4										CTSD			Hs.38972
SAT	Spermidine/spermine N1-acetyltransferase										CTSH			Hs.99171
SCRN1	Secernin 1										CTSK			Hs.169047
SET7	SET domain-containing protein 7										CTTN			Hs.410037
SFRS2	Hypothetical protein ET										CXCL12			Hs.515018
SNAI2	Snail homolog 2 (Drosophila)										CXCL6			Hs.521869
SRRM2	Serine/arginine repetitive matrix 2										CXCR4			Hs.1144
SSB	Sjogren syndrome antigen B (autoantigen La)										CYR61			Hs.514581
SYPL	Synaptophysin-like 1										DAG1			Hs.520640
TAGLN2	Transgelin 2										DNAJA3			Hs.78913
TMEM30A	Transmembrane protein 30A										DNCL1			Hs.413083
TRPC4AP	Transient receptor potential cation channel, subfamily C, member 4 associated protein										DNMT3B			Hs.128846
UACA	Uveal autoantigen with coiled-coil domains and ankyrin repeats										DPYD			Hs.130316
UBE2D3	Threonine synthase, chloroplast										DRG1			Hs.118118
WNT5A	Wingless-type MMTV integration site family, member 5A										DRIM			Hs.479747
ZDHHC7	Zinc finger, DHHC-type containing 7										EBAG9			Hs.514107
ZNF265	Zinc finger protein 265										ECGF1			Hs.103527
											EDN1			Hs.82848
											EGFR			Hs.413924
											EGR1			Hs.753
											ENG			Hs.471200
											EPHA2			Hs.169875
											EPHB2			Hs.474270
											EPO			Hs.376032
											EPOR			Hs.568322
											ERBB2			Hs.89714
											ESR1			Hs.143436
											ESR2			Hs.388613
											ETV4			Hs.38449
											F2R			Hs.438231
											F2RL1			Hs.30054
											F3			Hs.483635
											F7			Hs.440848
											FADD			Hs.303649
											FAP			Hs.513044
											FAS			Hs.355899
											FASLG			Hs.522891
											FGFR4			Hs.528665
											FHIT			Hs.166015
											FIGF			Hs.471525
											FLT1			Hs.68879
											FLT4			Hs.546251
											FN1			Hs.413812
											FXYD5			Hs.154495
											FYN			Hs.491582
											GAL3ST2			Hs.1722
											GALNT3			Hs.435765
											GNB3			Hs.435136
											GPI			Hs.500101
											GPR54			Hs.414795
											GRN			Hs.369397
											GSTM1			Hs.154210
											GSTP1			Hs.445466
											GSTT1			Hs.190977
											GUSB			Hs.162757
											HAS1			Hs.313
											HAS2			Hs.114286
											HGF			Hs.75703
											HIF1A			Hs.115263
											HMGA1			Hs.466039
											HMMR			Hs.37003
											HPSE			Hs.505033
											HPSE2			Hs.502876
											HTATIP2			Hs.517356
											ICAM1			Hs.76530
											ID1			Hs.443681
											ID3			Hs.1048
											IDH1			Hs.301921
											IGF1R			Hs.154057
											IGFBP3			Hs.435215
											IGSF8			Hs.514821
											IL8			Hs.300774
											ITGA3			Hs.1321
											ITGA5			Hs.143250
											ITGAV			Hs.74034
											ITGB1			Hs.174103
											ITGB3			Hs.76753
											ITGB4			Hs.46468
											ITGB6			Hs.160562
											ITIH1			Hs.396530
											ITIH3			Hs.1832
											JAG1			Hs.2164
											JAM3			Hs.408249
											KIAA0649			Hs.482077
											KISS1			Hs.11392
											KLK13			Hs.506190
											KLK6			Hs.466871
											KLK7			Hs.525330
											KLK8			Hs.530509
											KNG1			Hs.169249
											KRT20
											L1CAM
											LAMA4
											LAMB1
											LAMB2
											LAMC1
											LAMC2
											LAMC3
											LAMP1
											LAMP2
											LASS2
											LCN2
											LEP
											LEPR
											LGALS3BP
											LGALS9
											LIMS1
											LOC441792
											LOC442546
											LOX
											LRP5
											LYPD3
											LYPD5
											MALAT1
											MAP2K4
											MAPK8IP1
											MARK2
											MBD3
											MED19
											MET
											METAP2
											MKI67
											MME
											MMP1
											MMP10
											MMP11
											MMP12
											MMP13
											MMP14
											MMP15
											MMP16
											MMP17
											MMP19
											MMP2
											MMP20
											MMP21
											MMP23A
											MMP23B
											MMP24
											MMP25
											MMP26
											MMP27
											MMP28
											MMP3
											MMP7
											MMP8
											MMP9
											MMPL1
											MRPL40
											MRPL47
											MSN
											MTA1
											MTA2
											MTA3
											MTDH
											MTSS1
											MUC1
											MUC16
											MYC
											NFKB1
											NME1
											NME4
											NOS2A
											NR4A1
											NUAK1
											OCLN
											P8
											PAR1
											PAX3
											PAX7
											PBP
											PCNA
											PLA2G2A
											PLAU
											PLAUR
											PPARG
											PPARGC1A
											PPFIBP1
											PPP1R3A
											PPP1R9B
											PRDX2
											PRL
											PSMD10
											PTEN
											PTGES
											PTGS1
											PTGS2
											PTHLH
											PTK2
											PTP4A3
											PTTG1
											RAC1
											RARB
											RECK
											RHOA
											RHOC
											ROCK1
											RORA
											RPSA
											RRM1
											S100A11
											S100A2
											S100A4
											SDC1
											SDCBP
											SELE
											SEMA3F
											SERPINB3
											SERPINB5
											SERPINE1
											SFN
											SIPA1
											SKP2
											SLC2A1
											SLC35C2
											SLPI
											SMAD4
											SNAI1
											SNAI2
											SOCS1
											SPA17
											SPAM1
											SPHK1
											SPP1
											SRC
											SSR4
											SSTR2
											ST14
											ST8SIA1
											STAT3
											SYK
											SYNPO2
											TBXAS1
											TCF7L2
											TFF2
											TFF3
											TFPI2
											TGFB1
											TGFBI
											TGFBR2
											TGM2
											THBS1
											TIAM1
											TIAM2
											TIMP1
											TIMP2
											TIMP3
											TJP1
											TM4SF1
											TMPRSS2
											TNF
											TNFRSF11B
											TNFSF11
											TP53
											TRIM25
											TRPM1
											TTIM1
											TWIST1
											UGDH
											UMPS
											UPP1
											VCAM1
											VCP
											VEGF
											VEGFC
											VIL2
											VIM
											XLKD1

## Sheet: Table3
	Total ammount of Unigene clusters >,=2	Statistical significance	mean cluster size (stat.signif.)	stdev (stat.signif.)	No statistical significance	mean cluster size (no stat.signif.)	stdev (no stat.signif.)
	Met.1/Met.4	760	28.83	71.53	3445	7.9	16.5
	Met.1/Met.3	961	29.07	67.17	3244	6.53	10.91
	Met.1/Met.5	1023	27.69	65.21	3182	6.54	11.24
	Met.1/Met.2	1215	25.23	60.35	2990	6.18	10.95
	Metastasis associated Unigene clusters >,=2	Statistical significance	mean cluster size (stat.signif.)	stdev (stat.signif.)	No statistical significance	mean cluster size (no stat.signif.)	stdev (no stat.signif.)
	Met.1/Met.4	42	51.21	89.86	63	15.65	16.22
	Met.1/Met.3	59	38.3	75	46	19.05	31.06
	Met.1/Met.5	46	41.93	79.94	59	20.47	37.08
	Met.1/Met.2	54	44.44	79.83	51	14.45	18.89
	Multi-functional Unigene clusters >,=2	Statistical significance	mean cluster size (stat.signif.)	stdev (stat.signif.)	No statistical significance	mean cluster size (no stat.signif.)	stdev (no stat.signif.)
	Met.1/Met.4	18	70	122.92	34	15.52	15.16
	Met.1/Met.3	29	52.1	98.83	23	12.26	16.87
	Met.1/Met.5	22	67	109.94	30	10.2	11.92
	Met.1/Met.2	24	56.45	108.26	28	15.64	17.89
	Statistical significance (p<0.05, z-test)
	(stat.signif.)-Statistical significance
	(no stat.signif.)-No statistical significance
	stdev- standard deviation

## Sheet: Table4
A
B
C
A	Unsupervized	No statistical significance	Statistical significance	Common statistical significance
	Met.1/Met.2	2990	1215	114
	Met.1/Met.3	3244	961	114
	Met.1/Met.4	3445	760	114
	Met.1/Met.5	3182	1023	114
B	Metastasis-associated	No statistical significance	Statistical significance	Common statistical significance
	Met.1/Met.2	51	54	6
	Met.1/Met.3	46	59	6
	Met.1/Met.4	63	42	6
	Met.1/Met.5	59	46	6
C	Multi-functional	No statistical significance	Statistical significance	Common statistical significance
	Met.1/Met.2	28	24	5
	Met.1/Met.3	23	29	5
	Met.1/Met.4	34	18	5
	Met.1/Met.5	30	22	5
				Statistical significance (p<0.05, z-test)
	Yellow represents differentially expressed genes with statistical significance for each correspondent comparison (p<0.05, z-test)
	Light Blue represents differentially expressed genes, which appeared in all 4 comparisons with statistical significance (p<0.05, z-test)
	Purple represents the genes without statistically significant difference in the expression level

## Sheet: Table5abc
Table 5a							Table 5b							Table 5c
Gene symbol	Gene name	Mean 1	Mean 2	Ratio			Gene symbol	Gene name	Mean 1	Mean 2	Ratio
	Chondrocyte markers							Down-regulated in the metastases
								as in MSC (S Boeuf et al. J Pathol 2008;216:158-166)
	Down-regulated in the metastases
							CHI3L1*	Chitinase 3-like 1 (cartilage glycoprotein-39)	159	0.6	265
AGC1	Aggrecan 1 (chondroitin sulfate proteoglycan 1)	50	0.2	250			AGC1	Aggrecan 1 (chondroitin sulfate proteoglycan 1)	50	0.2	250
COMP	Cartilage oligomeric matrix protein	214	1.4	152.857			COMP	Cartilage oligomeric matrix protein	214	1.4	152.857
CDH11	Cadherin 11, type 2, OB-cadherin (osteoblast)	41	3.2	12.8125			SCRG1	Scrapie responsive protein 1	46	0.8	57.5
COL1A1	Collagen, type I, alpha 1	587	91.8	6.39434			THBS4	Thrombospondin 4	11.5	0.2	57.5
FMOD	Fibromodulin	26	5.6	4.64286			COL1A1	Collagen, type I, alpha 1	587	91.8	6.39434
BGN	Biglycan	70	16	4.375			SERPINF1	Serpin peptidase inhibitor, clade F	9.5	0.4	23.75
IGFBP3	Insulin-like growth factor binding protein 3	44.5	15.6	2.85256			SERPINE2*	Serpin peptidase inhibitor, clade E	160.5	15.4	10.4221
COL3A1	Collagen, type III, alpha 1	167.5	63.2	2.65032			FMOD	Fibromodulin	26	5.6	4.64286
CD99	CD99 antigen	49	20.6	2.37864			BGN	Biglycan	70	16	4.375
CD151	CD151 antigen	171	84.4	2.02607			COL3A1	Collagen, type III, alpha 1	167.5	63.2	2.65032
MMP2	Matrix metallopeptidase 2 (gelatinase A)	113	60.8	1.85855			ACTA1*	Actin, alpha 1, skeletal muscle	19.5	10.8	1.80556
PRKCSH	Protein kinase C substrate 80K-H	51.5	28.2	1.82624			SPARC	Secreted protein, acidic, cysteine-rich (osteonectin)	168.5	108.2	1.5573			Cell line	% invasion	Y error
PFN1	Profilin 1	226.5	128.4	1.76402										Met.1	4.1	0.22
ACTN1	Actinin, alpha 1	41.5	26.6	1.56015				Up-regulated in the metastases						Met.4	5.4	0.13
SPARC	Secreted protein, acidic, cysteine-rich (osteonectin)	168.5	108.2	1.5573				as in MSC (S Boeuf et al. J Pathol 2008;216:158-166)						Met.5	4.4	0.39
UCHL1	Ubiquitin carboxyl-terminal esterase L1	52	36.2	1.43646										NM.1	1.8	0.05
S100A11	S100 calcium binding protein A11 (calgizzarin)	32.5	25.2	1.28968			LAMB1	Laminin, beta 1	0.5	13.6	0.0367647			NM.2	2.3	0.11
							MMP1	Matrix metallopeptidase 1 (interstitial collagenase)	2.5	42.8	0.0584112
	Up-regulated in the metastases						TIMP2	TIMP metallopeptidase inhibitor 2	42.5	71.6	0.593575
							LGALS1	Lectin, galactoside-binding, soluble, 1 (galectin 1)	171	201.4	0.849057
NID2	Nidogen 2 (osteonidogen)	0.5	15.4	0.0324675
CALM2	Calmodulin 2 (phosphorylase kinase, delta)	23	75.2	0.305851				Altered expression in the metastases
CD44	CD44 antigen	13	32.4	0.401235				as in MSC (S Boeuf et al. J Pathol 2008;216:158-166)
ALDOA	Aldolase A, fructose-bisphosphate	109	165.6	0.658213
CRTAP	Cartilage associated protein	12	17.6	0.681818			IGFBP6	Insulin-like growth factor binding protein 6	125	41	3.04878
P4HB	Procollagen-proline, 2-oxoglutarate 4-dioxygenase	71.5	90.2	0.792683			COL12A1	Collagen, type XII, alpha 1	17	12.4	1.37097
							TIMP1	TIMP metallopeptidase inhibitor 1	161	118.2	1.3621
							FBLN1	Fibulin 1	10.5	8.2	1.28049
	Conventional chondrosarcoma markers						CTSB	Cathepsin B	137	113.6	1.20599
							FHL2	Four and a half LIM domains 2	9	7.6	1.18421
COL1A1	Collagen, type I, alpha 1	587	91.8	6.39434			LUM	Lumican	11	39.6	0.277778
EXT2	Exostoses (multiple) 2	11.5	5.4	2.12963			THBS1	Thrombospondin 1	11	31.4	0.350318
VIM	Vimentin	153.5	119.4	1.28559			FN1	Fibronectin 1	176	553.4	0.318034
EXT1	Exostoses (multiple) 1	20.5	19	1.07895			DCN	Decorin	31.5	62.4	0.504808
TNFRSF11B	Tumor necrosis factor receptor superfamily, member 11b (osteoprotegerin)	8	49	0.163265
LGALS1	Lectin, galactoside-binding, soluble, 1 (galectin 1)	171	201.4	0.849057
	House-keeping gene							House-keeping gene
GAPDH	Glyceraldehyde-3-phosphate dehydrogenase	126.5	130.8	0.967125			GAPDH	Glyceraldehyde-3-phosphate dehydrogenase	126.5	130.8	0.967125
Bold Italic- genes expressed at the level of house-keeping genes or higher in Mean1, Mean2 or both							Bold Italic- genes expressed at the level of house-keeping genes or higher in Mean1, Mean2 or both
Mean 1- expression levels in the virtual non-metastatic tumor							Mean 1- expression levels in the virtual non-metastatic tumor
Mean 2- expression levels in the metastases							Mean 2- expression levels in the metastases
Ratio- (mean1:mean2)							Ratio- (mean1:mean2)
							CHI3L1*-no difference in CHI3L2 expression (which was documented in S Boeuf et al. J Pathol 2008;216:158-166)
							SERPINE2*-no difference in SERPINA3 expression (which was documented in S Boeuf et al. J Pathol 2008;216:158-166)
							ACTA1* - there is no expression data for ACTA2 in our dataset (which was documented in S Boeuf et al. J Pathol 2008;216:158-166)

## Sheet: Fig.1
			Fig.1
